# Supplementary material for: Multitemporal glacier inventory revealing four decades of glacier changes in the Ladakh region
Source: Copernicus journal article supplement (doi:10.5194/essd-14-4171-2022), 2022-09-09
Supplement: Supplementary file 1 [file essd-14-4171-2022-supplement.zip]

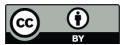

## *Supplement of*

# **Multitemporal glacier inventory revealing four decades of glacier changes in the Ladakh region**

**Mohd Soheb et al.**

*Correspondence to:* Mohd Soheb (sohaib.achaa@gmail.com)

- [essd-14-4171-2022-supplement-title-page.pdf](#)
- [Supplementary\\_Tables](#)
  - [Comparasion\\_Table\\_S3.csv](#)
  - [ESSD\\_SOHEB\\_2022\\_SUPP\\_FINAL.docx](#)
  - [Imagery\\_Used\\_Table\\_S1.csv](#)
  - [Uncertainty\\_Table\\_S2.csv](#)

The copyright of individual parts of the supplement might differ from the article licence.
