# Supplementary material for: Multitemporal glacier inventory revealing four decades of glacier changes in the Ladakh region
Source: Copernicus journal article supplement (doi:10.5194/essd-14-4171-2022), 2022-09-09
Supplement: Supplementary file 1 [file ESSD_SOHEB_2022_SUPP_FINAL.docx]

SUPPLIMENTARY MATERIALS TO:

**Multi-temporal glacier inventory revealing four decades of glacier changes in the Ladakh region**

Mohd Soheb1, Alagappan Ramanathan1, Anshuman Bhardwaj2, Millie Coleman2,3, Brice R. Rea2, Matteo Spagnolo2, Shaktiman Singh2, Lydia Sam2

1 School of Environmental Sciences, Jawaharlal Nehru University, India

2School of Geosciences, University of Aberdeen, United Kingdom

2School of Natural and Built Environment, Queen’s University Belfast, United Kingdom

*Correspondence to*: Mohd Soheb ([sohaib.achaa@gmail.com](mailto:sohaib.achaa@gmail.com))

**Note**: Supplementary tables (S1, S2 and S3) are also available as csv format.

Table S1. Details of the imagery used in this study

| Satellite Sensor  (date of acquisition) | Scene ID | Imagery date | Path/  Row | Purpose | Source | |
| --- | --- | --- | --- | --- | --- | --- |
| Landsat MSS  (22 Sept. 1972 – 22 Oct. 1980) | LM01_L1GS_157037_19721027_20180429_01_T2  LM01_L1TP_158037_19720922_20180429_01_T2  LM02_L1TP_156037_19761014_20180424_01_T2  LM02_L1TP_156038_19761014_20180424_01_T2  LM02_L1TP_159035_19760911_20180424_01_T2  LM02_L1TP_159037_19760911_20180424_01_T2  LM02_L1TP_157036_19770922_20180423_01_T2  LM02_L1TP_157037_19770922_20180423_01_T2  LM02_L1TP_159036_19770801_20180422_01_T2  LM02_L1GS_158036_19770818_20180422_01_T2  LM02_L1TP_158036_19770713_20180422_01_T2  LM02_L1TP_159035_19770714_20180422_01_T2  LM02_L1TP_155038_19770920_20180423_01_T2  LM02_L1TP_160036_19770907_20180423_01_T2  LM03_L1TP_160036_19790906_20180419_01_T2  LM03_L1TP_158037_19801022_20180418_01_T2  LM03_L1TP_157038_19800915_20180417_01_T2 | 27 Oct. 1972  22 Sept. 1972  14 Oct. 1976  14 Oct. 1976  11 Sept. 1976  11 Sept. 1976  22 Sept. 1977  22 Sept. 1977  01 Aug. 1977  18 Aug. 1977  13 Jul. 1977  14 Jul. 1977  20 Sept. 1977  07 Sept. 1977  06 Sept. 1979  22 Oct. 1980  15 Sept. 1980 | 157/37  158/37  156/37  156/38  159/35  159/37  157/36  157/37  159/36  158/36  158/36  159/35  155/38  160/36  160/36  158/37  157/38 | Glacier Boundary Delineation and Snow Line Mapping | | (https://earthexplorer.usgs.gov/) |
| Landsat TM  (07 Jul. 1993 – 21 Oct. 1994) | LT05_L1TP_147035_19930902_20170117_01_T1  LT05_L1TP_148035_19930707_20170118_01_T1  LT05_L1TP_144038_19941018_20170112_01_T1  LT05_L1TP_145036_19940923_20170112_01_T1  LT05_L1TP_145037_19940923_20170112_01_T1  LT05_L1TP_145038_19941009_20170112_01_T1  LT05_L1TP_146036_19940930_20170112_01_T1  LT05_L1TP_146037_19940930_20170112_01_T1  LT05_L1TP_146038_19940930_20170112_01_T1  LT05_L1TP_147036_19940921_20170112_01_T1  LT05_L1TP_147037_19940921_20170112_01_T1  LT05_L1TP_148036_19940726_20170113_01_T1  LT05_L1TP_148037_19940726_20170113_01_T2  LT05_L1TP_149036_19941021_20170111_01_T1 | 02 Sept. 1993  07 Jul. 1993  18 Oct. 1994  23 Sept. 1994  23 Sept. 1994  09 Oct. 1994  30 Sept. 1994  30 Sept. 1994  30 Sept. 1994  21 Sept. 1994  21 Sept. 1994  26 Jul. 1994  26 Jul. 1994  21 Oct. 1994 | 147/35  148/35  144/38  145/36  145/37  145/38  146/36  146/37  146/38  147/36  147/37  148/36  148/37  149/36 |
| Landsat TM  (04 Aug. 2009 – 30 Sep. 2009) | LT05_L1TP_145036_20090815_20161022_01_T1  LT05_L1TP_145037_20090916_20161020_01_T1  LT05_L1TP_146036_20090923_20161020_01_T1  LT05_L1TP_146037_20090923_20161020_01_T1  LT05_L1TP_146038_20090923_20161020_01_T1  LT05_L1TP_147035_20090930_20161019_01_T1  LT05_L1TP_147036_20090930_20161019_01_T1  LT05_L1TP_147037_20090930_20161019_01_T1  LT05_L1TP_148035_20090804_20161026_01_T1  LT05_L1TP_148036_20090921_20161020_01_T1  LT05_L1TP_148037_20090921_20161020_01_T1  LT05_L1TP_149035_20090827_20161021_01_T1  LT05_L1TP_149036_20090827_20161022_01_T1  LT05_L1TP_147037_20090813_20161022_01_T1  LT05_L1TP_146038_20090907_20161021_01_T1  LT05_L1TP_146037_20090907_20161021_01_T1  LT05_L1TP_144038_20090824_20161022_01_T1  LT051450382009073001T1-SC20200810160011 | 15 Aug. 2009  16 Sept. 2009  23 Sept. 2009  23 Sept. 2009  23 Sept. 2009  30 Sept. 2009  30 Sept. 2009  30 Sept. 2009  04 Aug. 2009  21 Sept. 2009  21 Sept. 2009  27 Aug. 2009  27 Aug. 2009  13 Aug. 2009  07 Sept. 2009  07 Sept. 2009  24 Aug. 2009  30 Jul. 2009 | 145/36  145/37  145/38  146/36  146/37  146/38  147/35  147/36  147/37  148/35  148/36  148/37  149/36  147/37  146/38  146/37  144/38  145/38 | Glacier Boundary Delineation and Snow Line Mapping | | (https://earthexplorer.usgs.gov/) |
| Landsat OLI  (29 Aug. 2018 – 23 Oct. 2019) | LC08_L1TP_144038_20191023_20191030_01_T1  LC08_L1TP_145036_20190912_20190917_01_T1  LC08_L1TP_145037_20190912_20190917_01_T1  LC08_L1TP_145038_20190912_20190917_01_T1  LC08_L1TP_146036_20190903_20190916_01_T1  LC08_L1TP_146037_20190919_20190926_01_T1  LC08_L1TP_146038_20190919_20190926_01_T1  LC08_L1TP_147035_20190910_20190917_01_T1  LC08_L1TP_147036_20190910_20190917_01_T1  LC08_L1TP_147037_20190910_20190917_01_T1  LC08_L1TP_148035_20190816_20190821_01_T1  LC08_L1TP_148036_20190816_20190821_01_T1  LC08_L1TP_148037_20180829_20180911_01_T1  LC08_L1TP_149036_20190924_20191017_01_T1 | 23 Oct. 2019  12 Sept. 2019  12 Sept. 2019  12 Sept. 2019  03 Sept. 2019  19 Sept. 2019  19 Sept. 2019  10 Sept. 2019  10 Sept. 2019  10 Sept. 2019  16 Aug. 2019  16 Aug. 2019  29 Aug. 2018  24 Sept. 2019 | 144/38  145/36  145/37  145/38  146/36  146/37  146/38  147/35  147/36  147/37  148/35  148/36  148/37  149/36 |
| ASTER GDEM  (1 Jan. 2000 – 30 Nov. 2013) | ASTGTMV003_N32E080  ASTGTMV003_N33E080  ASTGTMV003_N34E075  ASTGTMV003_N34E079  ASTGTMV003_N32E078  ASTGTMV003_N33E076  ASTGTMV003_N32E077  ASTGTMV003_N35E077  ASTGTMV003_N35E076  ASTGTMV003_N33E078  ASTGTMV003_N34E078  ASTGTMV003_N34E077  ASTGTMV003_N34E076  ASTGTMV003_N32E079  ASTGTMV003_N35E078  ASTGTMV003_N33E079  ASTGTMV003_N33E077 | 01 March 2000 – 30 November 2013 | N32E080  N33E080  N34E075  N34E079  N32E078  N33E076  N32E077  N35E077  N35E076  N33E078  N34E078  N34E077  N34E076  N32E079  N35E078  N33E079  N33E077 | Catchment Delineation | <https://search.earthdata.nasa.gov/> | |

Table S2: Estimated uncertainty for different sensors and area classes through buffer based assessment.

| **Sensor** | **Year** | **Area uncertainty** | | | **Length uncertainty** | | |
| --- | --- | --- | --- | --- | --- | --- | --- |
| **Area (Km2)** | **Uncertainty (Km2)** | **Uncertainty (%)** | **Length range (Km)** | **Uncertainty (Km)** | **Uncertainty (%)** |
| Landsat (MSS) | 1977 | 8511 | ±430 | ±7.2 | 0.7-74 | ±0.08 | ±2.6 |
| Landsat (TM) | 1994 | 8173 | ±215 | ±3.9 | 0.5-73.7 | ±0.04 | ±1.5 |
| Landsat (TM) | 2009 | 8096 | ±214 | ±3.9 | 0.5-73.7 | ±0.04 | ±1.5 |
| Landsat (OLI) | 2019 | 7923 | ±106 | ±2.1 | 0.5-72.5 | ±0.04 | ±1.5 |
| Overall mean | 1977-2019 | 8175 | ±241 | ±4.2 | 0.5-73.5 | ±0.05 | ±1.8 |
|  |  |  |  |  |  |  |  |
| **Area Class** | **Year** | **Area (Km2)** | **Uncertainty (Km2)** | **Uncertainty (%)** | **Length range (Km)** | **Uncertainty (Km)** | **Uncertainty (%)** |
| 0.5 – 1 km2 | 1977-2019 | 788 | ±31 | ±5.3 | 0.5-3.2 | ±0.02 | ±1 |
| 1 – 5 km2 | 1977-2019 | 2327 | ±96 | ±4.0 | 0.6-6.3 | ±0.04 | ±0.6 |
| 5 – 10 km2 | 1977-2019 | 867 | ±27 | ±2.9 | 2.8-9.6 | ±0.08 | ±0.3 |
| 10 – 50 km2 | 1977-2019 | 1631 | ±40 | ±2.5 | 4.4-17.8 | ±0.14 | ±0.2 |
| 50 – 100 km2 | 1977-2019 | 678 | ±15 | ±2.2 | 13.4-23.7 | ±0.28 | ±0.1 |
| > 100 km2 | 1977-2019 | 1885 | ±33 | ±1.9 | 21.2-72.5 | ±0.54 | ±0.05 |

Table S3: Comparison of glacier change attributes between the present study and others recent studies.

| **Source** | **Basin** | **Range/ Glacier/ Region** | **Code** | **Other recent studies** | | | | | **Present study** | | | | |
| --- | --- | --- | --- | --- | --- | --- | --- | --- | --- | --- | --- | --- | --- |
| **No. of glaciers** | **Size (km2)** | **Year** | **Total Retreat (%)** | **Retreat rate (%/year)** | **No. of glaciers** | **Size (km2)** | **Year** | **Total Retreat (%)** | **Retreat rate (%/year)** |
| Negi et al., 2021 | Shayok | Shayok sub-basin | SSB | 569 | >1 | 1991-2014 | -0.19 | -0.008 | 603 | >1 | 1994-2019 | -0.94 | -0.038 |
| Siachen Glacier | A | 1 | >100 | 1990-2014 | -0.08 | -0.003 | 1 | >100 | 1994-2019 | -0.28 | -0.007 |
| Central Rimo Glacier | B | 1 | >100 | 1990-2014 | -0.52 | -0.022 | 1 | >100 | 1994-2019 | 0.61 | 0.015 |
| Southern Rimo Glacier | C | 1 | >100 | 1990-2014 | -1.05 | -0.044 | 1 | >100 | 1994-2019 | -1.87 | -0.045 |
| Mamosto Glacier | F | 1 | 50-100 | 1990-2014 | -0.17 | -0.007 | 1 | 50-100 | 1994-2019 | -0.79 | -0.019 |
| Kumdan Glacier | D | 1 | 50-100 | 1990-2014 | -2.35 | -0.098 | 1 | 50-100 | 1994-2019 | -0.84 | -0.020 |
| Urdolep Glacier | J | 1 | 10-50 | 1990-2014 | -0.19 | -0.008 | 1 | 10-50 | 1994-2019 | -0.59 | -0.014 |
| Layongma Glacier | H | 1 | 10-50 | 1990-2014 | -1.71 | -0.071 | 1 | 10-50 | 1994-2019 | -2.39 | -0.057 |
| Lagongma Glacier | G | 1 | 10-50 | 1990-2014 | -0.27 | -0.011 | 1 | 10-50 | 1994-2019 | -1.47 | -0.035 |
| Aktash Glacier | E | 1 | 10-50 | 1990-2014 | 16.88 | 0.703 | 1 | 10-50 | 1994-2019 | 2.39 | 0.057 |
| Thusa Glacier | I | 1 | 10-50 | 1990-2014 | -7.47 | -0.311 | 1 | 10-50 | 1994-2019 | -1.81 | -0.043 |
| Bhambri et al. 2013 | Upper Shayok Basin | USB | 136 | >0.2 | 1974-2011 | 0.14 | 0.004 | 570 | >0.5 | 1977-2009 | -2.2 | -0.069 |
| Central Rimo Glacier | B | 1 | >100 | 1974-1998 | 0.04 | 0.002 | 1 | >100 | 1977-1994 | -1.88 | -0.111 |
| Central Rimo Glacier | B | 1 | >100 | 1998-2011 | -0.59 | -0.045 | 1 | >100 | 1994-2009 | 1.16 | 0.078 |
| Kumdan Glacier | D | 1 | 50-100 | 1974-1998 | -6.71 | -0.279 | 1 | 50-100 | 1977-1994 | -3.24 | -0.191 |
| Kumdan Glacier | D | 1 | 50-100 | 1998-2011 | 5.27 | 0.406 | 1 | 50-100 | 1994-2009 | 2.98 | 0.199 |
| Aktash Glacier | E | 1 | 10-50 | 1974-1998 | 0.37 | 0.016 | 1 | 10-50 | 1977-1994 | -0.78 | -0.048 |
| Aktash Glacier | E | 1 | 10-50 | 1998-2011 | 2.99 | 0.230 | 1 | 10-50 | 1994-2009 | 3.42 | 0.228 |
| Schmidt and Nüsser, 2017;  Schmidt and Nüsser, 2012 | Leh/ Zanskar/ Tsomoriri | Selected regions of central and eastern Ladakh | CEL | 1800 | >0.03 | 1969-2016 | -19 | -0.4 | 517 | >0.5 | 1977-2019 | -19.3 | -0.46 |
| Phuche Glacier | K | 1 | 0.5-1 | 1969-2016 | -18.0 | -0.50 | 1 | 0.5-1 | 1977-2019 | -21.0 | -0.50 |
| Hemis Shukpachen Glaciers | L | 5 | 0.2-1 | 1969-2016 | -38.0 | -0.80 | 2 | 0.5-1 | 1977-2019 | -33.0 | -0.78 |
| Stok Range | M | 7 | 0.2-1 | 1969-2016 | -22.4 | -0.40 | 3 | 0.5-1 | 1977-2019 | -10.5 | -0.30 |
| Kang Yatze | N | 35 | 0.5-1 | 1969-2010 | -18.8 | -0.40 | 26 | 0.5-1 | 1977-2010 | -24.0 | -0.50 |
| Kang Yatze | N | 25 | >1 | 1969-2010 | -12.2 | -0.20 | 17 | >1 | 1977-2010 | -11.0 | -0.25 |
| Lungser Range | O | 39 | 0.5-5 | 1969-2014 | -17.7 | -0.40 | 22 | 0.5-5 | 1977-2019 | -16.4 | -0.39 |
| Chudley et al, 2017 | Leh/ Shayok | Central Ladakh range | CLR | 76 | 1-5 | 1991-2014 | -6.6 | -0.29 | 82 | 1-5 | 1994-2019 | 7.1 | -0.39 |
| Shukla et al., 2020 | Suru | Suru Sub-basin | SUB1 | 130 | >0.5 | 1971-2017 | -9.08 | -0.20 | 136 | >0.5 | 1977-2019 | -14 | -0.28 |
| Suru Sub-basin | SUB2 | 22 | 0.5-1 | 1971-2017 | -24.04 | -0.52 | 22 | 0.5-1 | 1977-2019 | -25.18 | -0.60 |
| Suru Sub-basin | SUB3 | 47 | 1-5 | 1971-2017 | -12.10 | -0.26 | 47 | 1-5 | 1977-2019 | -16.03 | -0.38 |
| Suru Sub-basin | SUB4 | 15 | 5-10 | 1971-2017 | -4.15 | -0.09 | 15 | 5-10 | 1977-2019 | -7.91 | -0.19 |
| Suru Sub-basin | SUB5 | 6 | 10-50 | 1971-2017 | -11.11 | -0.24 | 6 | 10-50 | 1977-2010 | -4.33 | -0.10 |
| Suru Sub-basin | SUB6 | 1 | 50-100 | 1971-2017 | -0.28 | -0.01 | 1 | 50-100 | 1977-2010 | -1.24 | -0.03 |
| Tongul Glacier | P | 1 | 5-10 | 1971-2017 | -11.07 | -0.24 | 1 | 5-10 | 1977-2019 | -6.14 | -0.15 |
| Rantak Glacier | Q | 1 | 5-10 | 1971-2017 | -15.23 | -0.33 | 1 | 5-10 | 1977-2019 | -11.52 | -0.27 |
| Sentik Glacier | R | 1 | 1-5 | 1971-2017 | -14.06 | -0.31 | 1 | 1-5 | 1977-2019 | -10.48 | -0.25 |
| Parkachik Glacier | S | 1 | 10-50 | 1971-2017 | -0.27 | -0.01 | 1 | 10-50 | 1977-2019 | -1.24 | -0.03 |
| Shafat Glacier | T | 1 | 10-50 | 1971-2017 | -15.57 | -0.34 | 1 | 10-50 | 1977-2010 | -14.18 | -0.34 |
| Dulung Glacier | U | 1 | 10-50 | 1971-2017 | -10.81 | -0.24 | 1 | 10-50 | 1977-2010 | -9.05 | -0.22 |
| Chilung Glacier | V | 1 | 5-10 | 1971-2017 | -12.74 | -0.28 | 1 | 5-10 | 1977-2019 | -15.20 | -0.36 |
| Lalung Glacier | W | 1 | 10-50 | 1971-2017 | -6.57 | -0.14 | 1 | 10-50 | 1977-2019 | -3.35 | -0.08 |
| Pensilungpa Glacier | X | 1 | 10-50 | 1971-2017 | -6.14 | -0.13 | 1 | 10-50 | 1977-2019 | -3.39 | -0.08 |
| Garg et al., 2022 | Parkachik glacier | S | 1 | 10-50 | 1971-2018 | -3.30 | -0.07 | 1 | 10-50 | 1977-2019 | -1.24 | -0.03 |
| Garg et al., 2021 | Pensilungpa Glacier | X | 1 | 10-50 | 1993-2016 | -2.59 | -0.11 | 1 | 10-50 | 1994-2018 | -0.94 | -0.04 |


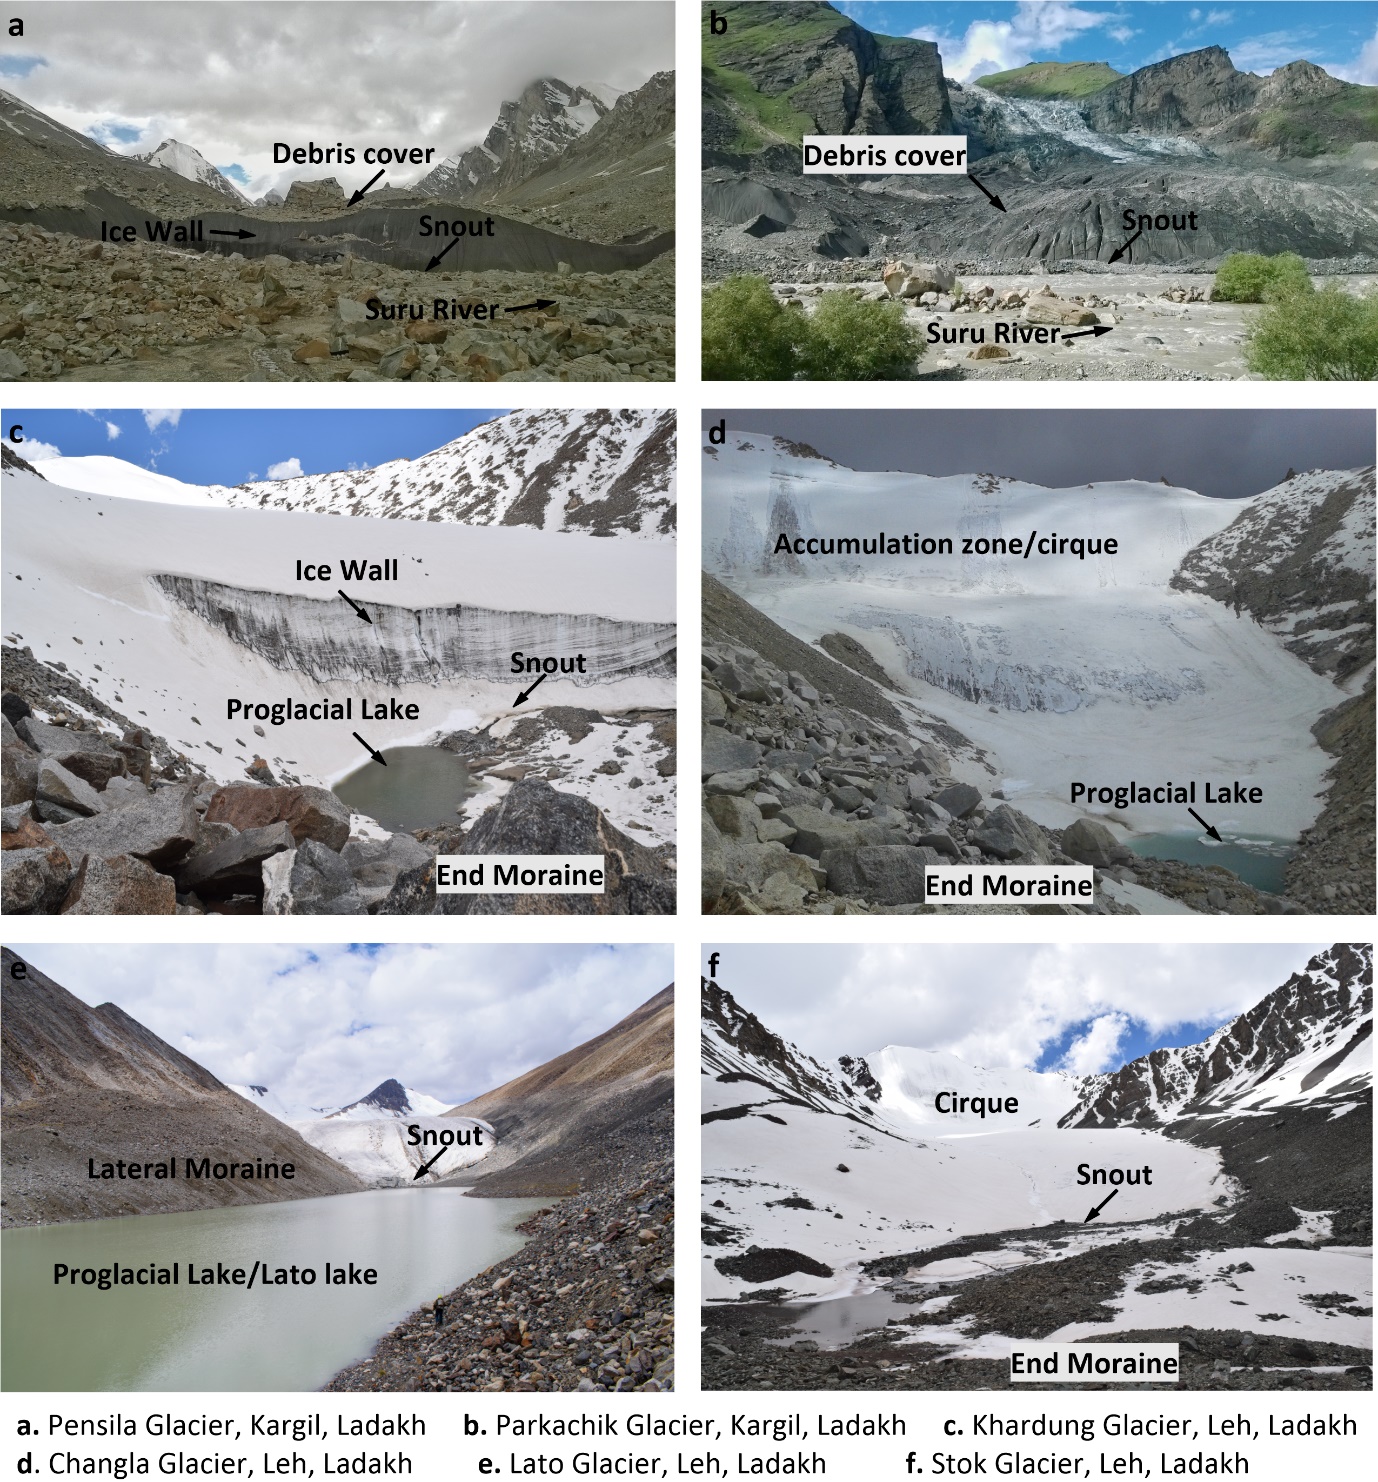


Figure S1: Some of the field investigated glaciers of the Ladakh region between 2016 and 2019. Glaciers of Suru Basin (a, b), Leh Basin (d, e, f) and Shayok Basin (c). The location of these glaciers is mentioned in Figure 1 with a star symbol.

**
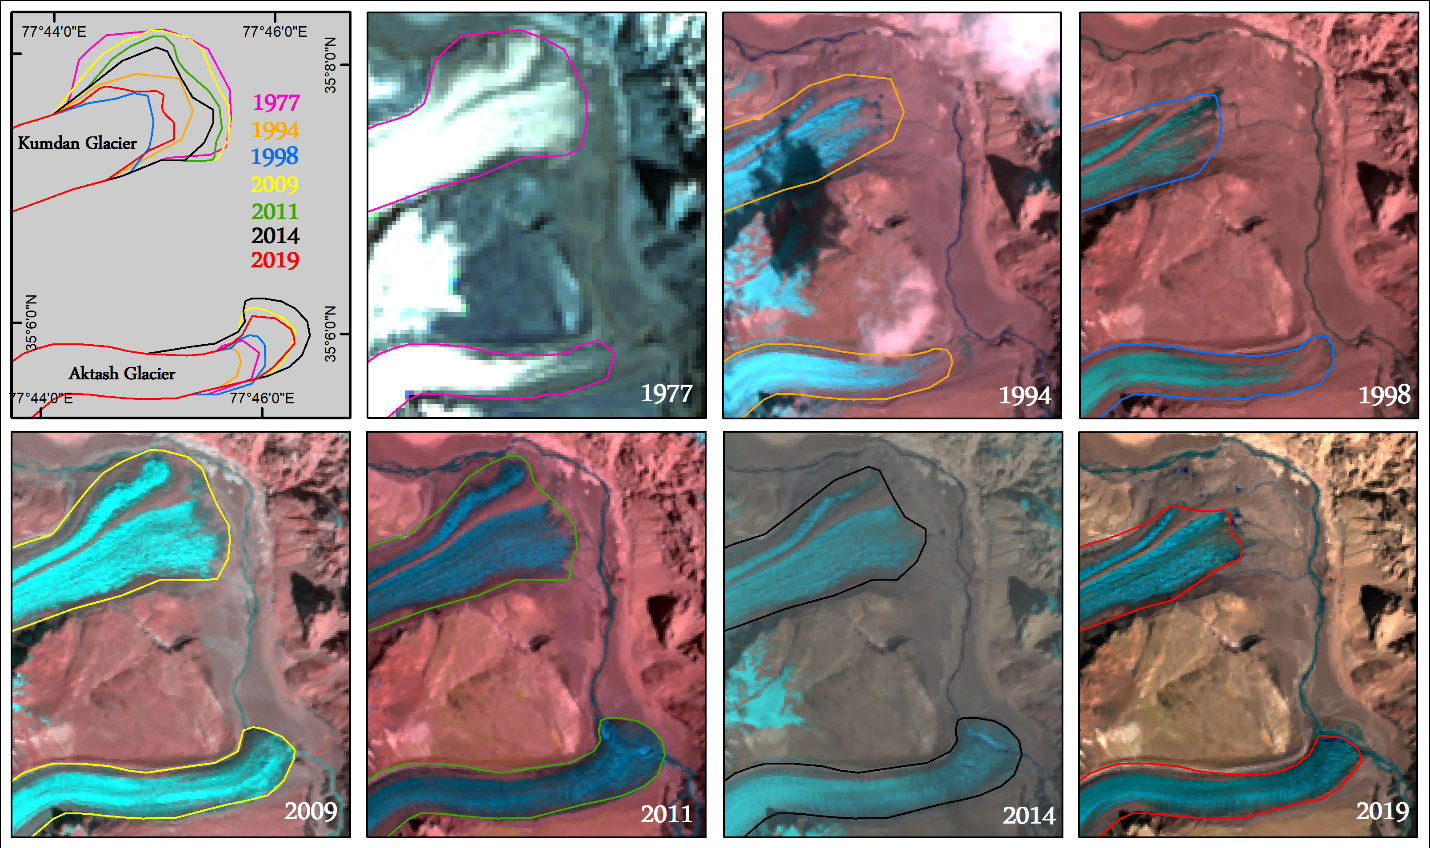
**

Figure S2: Presents the dynamics of Kumdan and Aktash glacier of Shayok basin as an example of a surge type glacier. Location of these glaciers are marked in Figure 5.
